# Supplementary material for: Identification of functional enhancer variants associated with type I diabetes in CD4+ T cells
Source: PubMed Central journal article supplement (PMC11211866; doi:10.3389/fimmu.2024.1387253), 2024-06-14
Supplement: Presentation_1.pdf [file Presentation_1.pdf]

## **SUPPLEMENTARY MATERIALS**

### **Identification of functional enhancer variants associated with type I diabetes in CD4+ T cells**

Arpit Mishra<sup>1,†</sup>, Ajay Jajodia<sup>1,†</sup>, Eryn Weston<sup>1</sup>, Naresh Doni Jayavelu<sup>1</sup>, Mariana Garcia<sup>1</sup>, Daniel Hossack<sup>1</sup>, R. David Hawkins<sup>1,2,3,\*</sup>

#### **Table of Contents**

Supplementary Figure 1. Upstream and downstream targets of enhancer variants.

Supplementary Figure 2. CRISPRi validation of enhancer-target gene interactions for *DEXI*.

Supplementary Table 1. Enhancer SNP MPRA.

Supplementary Table 2. Predicted allelic TF binding to validated enhancer variants.

Supplementary Table 3. CRISPRi guide RNAs and Taqman probes.

## Supplementary Figure 1

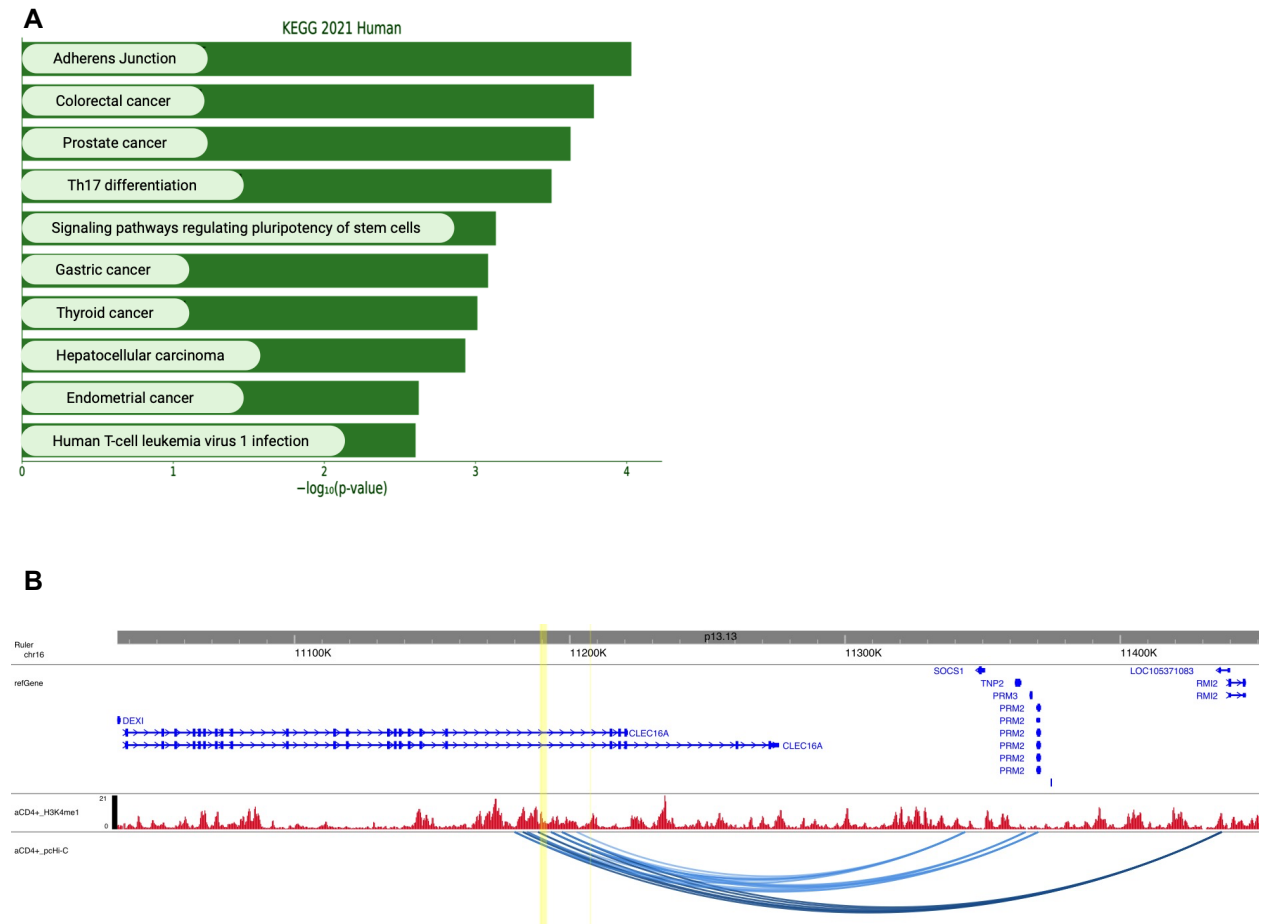

**Supplementary Figure 1.** Upstream and downstream targets of enhancer variants. **A.** KEGG pathways associated with T1D enhancer variant TFs. **B.** Promoter capture Hi-C enhancer target genes in the *CLEC16A* locus. Browser shot of *CLEC16A-RMI2* locus showing enhancer variants (yellow lines), H3K4me1 ChIP-seq data from activated CD4+ T cells (red) and activated CD4+ T cell pHi-C data with enhancer variant interactions to target genes in blue (*SOCS1* gene) and dark gray (*RMI2* gene).

## Supplementary Figure 2

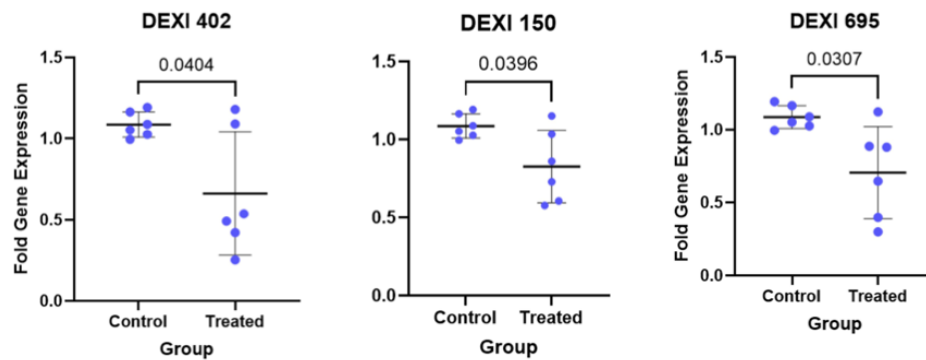

**Supplementary Figure 2.** CRISPRi validation of enhancer-target gene interactions for *DEXI* gene and enhancers harboring known eQTL variants rs12599402 (“402”), rs7203150 (“150”) and rs9746695 (“695”). Enhancer target gene expression level after enhancer (treated) repression by CRISPRi or using non-targeting control guide (Control). P values are indicated above the line in each comparison.
